# Supplementary material for: MMPphg from the thermophilic Meiothermus bacteriophage MMP17 as a potential antimicrobial agent against both Gram-negative and Gram-positive bacteria
Source: PubMed Central journal article supplement (PMC7448439; doi:10.1186/s12985-020-01403-0), 2020-08-25

Figure S1

**a**

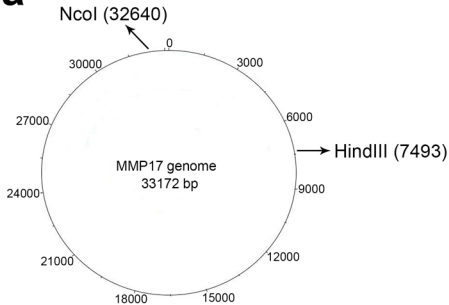

**b**

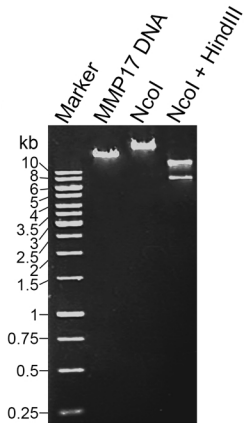

Supplement: 12985_2020_1403_MOESM1_ESM.pdf [file 12985_2020_1403_MOESM1_ESM.pdf]
