# Supplementary material for: MMPphg from the thermophilic Meiothermus bacteriophage MMP17 as a potential antimicrobial agent against both Gram-negative and Gram-positive bacteria
Source: PubMed Central journal article supplement (PMC7448439; doi:10.1186/s12985-020-01403-0), 2020-08-25
Supplement: 12985_2020_1403_MOESM2_ESM.pdf [file 12985_2020_1403_MOESM2_ESM.pdf]

Figure S2

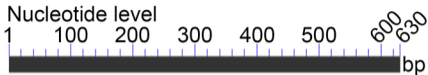

Specific hit: Peptidase M23

Superfamily: Peptidase M23 Superfamily

E-value=2.04e-20

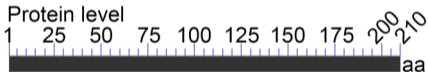

Specific hit: Peptidase M23

Superfamily: Peptidase M23 Superfamily

E-value=2.09e-20
